# Supplementary material for: One-step electrodeposited MoS2@Ni-mesh electrode for flexible and transparent asymmetric solid-state supercapacitors
Source: Royal Society of Chemistry journal article supplement (doi:10.1039/d0ta07764j), 2020-01-01
Supplement: d0ta07764j2.pdf [file d0ta07764j2.pdf]

## Electronic Supplementary Information (ESI)

### One-Step Electrodeposited MoS<sub>2</sub>@Ni-mesh Electrode for Flexible and Transparent Asymmetric Solid-State Supercapacitors

Soram Bobby Singh<sup>a</sup>, Dai Jiu Yi<sup>a</sup>, Thangjam Ibomcha Singh<sup>a</sup>, Nam Hoon Kim<sup>a</sup>,

Joong Hee Lee<sup>a, b, \*</sup>

<sup>a</sup> Department of Nano Convergence Engineering, Jeonbuk National University, Jeonju, Jeonbuk, 54896, Republic  
of Korea

<sup>b</sup> Carbon Composite Research Centre, Department of Polymer-Nano Science and Technology, Jeonbuk National  
University, Jeonju, Jeonbuk 54896, Republic of Korea.

\*Corresponding author: e-Mail: [jhl@jbnu.ac.kr](mailto:jhl@jbnu.ac.kr) (Joong Hee Lee)

## 1. Electrochemical characterization

Electrochemical properties of the MoS<sub>2</sub>@Ni-mesh and MnO<sub>2</sub>@Ni-mesh network electrode were measured at room temperature in a three-electrode configuration using MoS<sub>2</sub>@Ni-mesh and MnO<sub>2</sub>@Ni-mesh as the working electrode, Ag/AgCl as the reference electrode, and a Pt plate as the counter electrode respectively in 1 M Na<sub>2</sub>SO<sub>4</sub> electrolyte solution. In the case of the FT-ASSc device, two-electrode configuration mode was used to measure the electrochemical performance. All these electrochemical measurements were performed using a CH660E electrochemical workstation (CH Instruments, Inc., USA).

The areal capacitance (mF/cm<sup>2</sup>) of the single electrode was also derived from the CV scan using the following equation:

$$C/A = \frac{1}{vA\Delta V} \oint I(V)dV \quad (1)$$

where  $A$  was the effective area of the single electrode,  $v$  (V/s) was the potential scan rate, and  $\Delta V$  (V) was the window.

The  $C/A$  (in mF/cm<sup>2</sup>) was also calculated from the galvanostatic charge/discharge (GCD) curves using Equation (2)

$$C/A = \frac{I}{A \times (dV/dt)} \quad (2)$$

where  $I$  is the discharge current (A),  $A$  is the total area of the electrodes (cm<sup>2</sup>), and  $dV/dt$  is the slope of the galvanostatic discharge curve.

In the case of the two-electrode configuration system, the areal capacitance of the device was calculated based on the area of the device as according to the following Equation (3)

$$C_{device}^{areal} = \frac{1}{\nu A_{device} \Delta V} \oint I(V) dV \quad (3)$$

$$C_{device}^{areal} = \frac{I}{A_{device} \times (dV/dt)} \quad (4)$$

where  $C_{device}^{areal}$  (in mF/cm<sup>2</sup>) refer to the areal capacitance of the device and  $A_{device}$  is the total area (cm<sup>2</sup>) of the device electrodes,  $\nu$  (V/s) was the potential scan rate, and  $\Delta V$  (V) was the operating window of the device,  $I$  is the discharge current (A), and  $dV/dt$  is the slope of the GCD curve, respectively.

The volumetric capacitance (C/V in mF/cm<sup>3</sup>) was also calculated from the galvanostatic charge/discharge (GCD) curves using Equation (5)

$$C/V = \frac{I}{V \times (dV/dt)} \quad (5)$$

here  $I$  is the discharge current (A),  $V$  is the total volume of the device, and  $dV/dt$  is the slope of the galvanostatic discharge curve.

Energy densities and power densities were calculated using Equation (6) as follows

$$E = \frac{C \times (\Delta V)^2}{2 \times 3600} \quad (6a)$$

$$P = \frac{E \times 3600}{\Delta t} \quad (6b)$$

Where  $E$  is the energy density (Wh/cm<sup>2</sup>),  $C$  is the areal capacitance (F/cm<sup>2</sup>),  $\Delta V$  is the discharge voltage range (V) and  $\Delta t$  is the discharge time (s)

## 2. Characterization

Surface morphologies of the electrode samples were studied using FE-SEM, Carl Zeiss, SUPRA 40 VP, Germany, at the Center for University-wide Research Facilities (CURF), Jeonbuk National University, Korea. The internal structure, elemental composition, and spatial distribution of constituent elements were investigated using a high-resolution transmission electron microscope (HRTEM), a scanning transmission electron microscope (STEM) (JEM-2200 FS; JEOL Ltd., Japan, 200 kV), and energy-dispersive X-ray spectroscopy (EDX). The chemical compositions and elemental states of MoS<sub>2</sub>@Ni-mesh and MnO<sub>2</sub>@Ni-mesh network electrode were studied using an X-ray photoelectron spectroscopy (XPS) (Theta Probe AR-XPS System, Thermo Fisher Scientific, UK) at the KBSI center, JBNU campus. Transparencies of electrode samples and devices were analyzed using Jasco-ARSN-733 UV-Vis-NIR spectroscopy. Using a four-point-probe surface resistivity meter (MSTEC) coupled with a Keithley-2182A nano voltmeter having a Keithley-6221 DC/AC current source the sheet resistance of the electrode samples were measured. Mechanical flexible properties were tested with a Radius Bending Tester-JIRBT-610 coupled with a Keithley-6221 DC/AC current source. All these electrochemical measurements were performed using a CH660E electrochemical workstation (CH Instruments, Inc., USA). Atomic force microscope (AFM; XE-100, Park System Co., Korea).

## Supplementary Figures

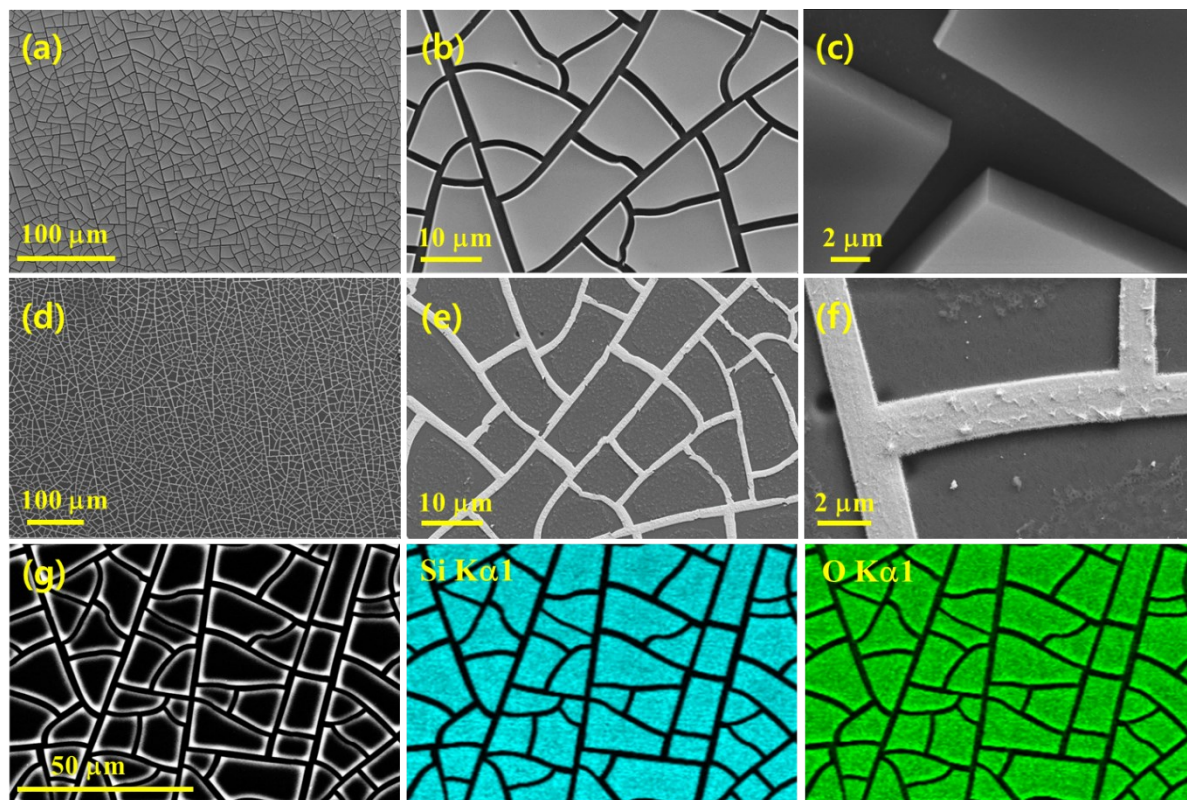

**Fig. S1** FE-SEM images : (a-c) cracked silica templated film. (d-f) Ni-mesh network at different magnifications after etching out silica template film. (g) EDS mapping image of Si-cracked templated film on PEN substrate.

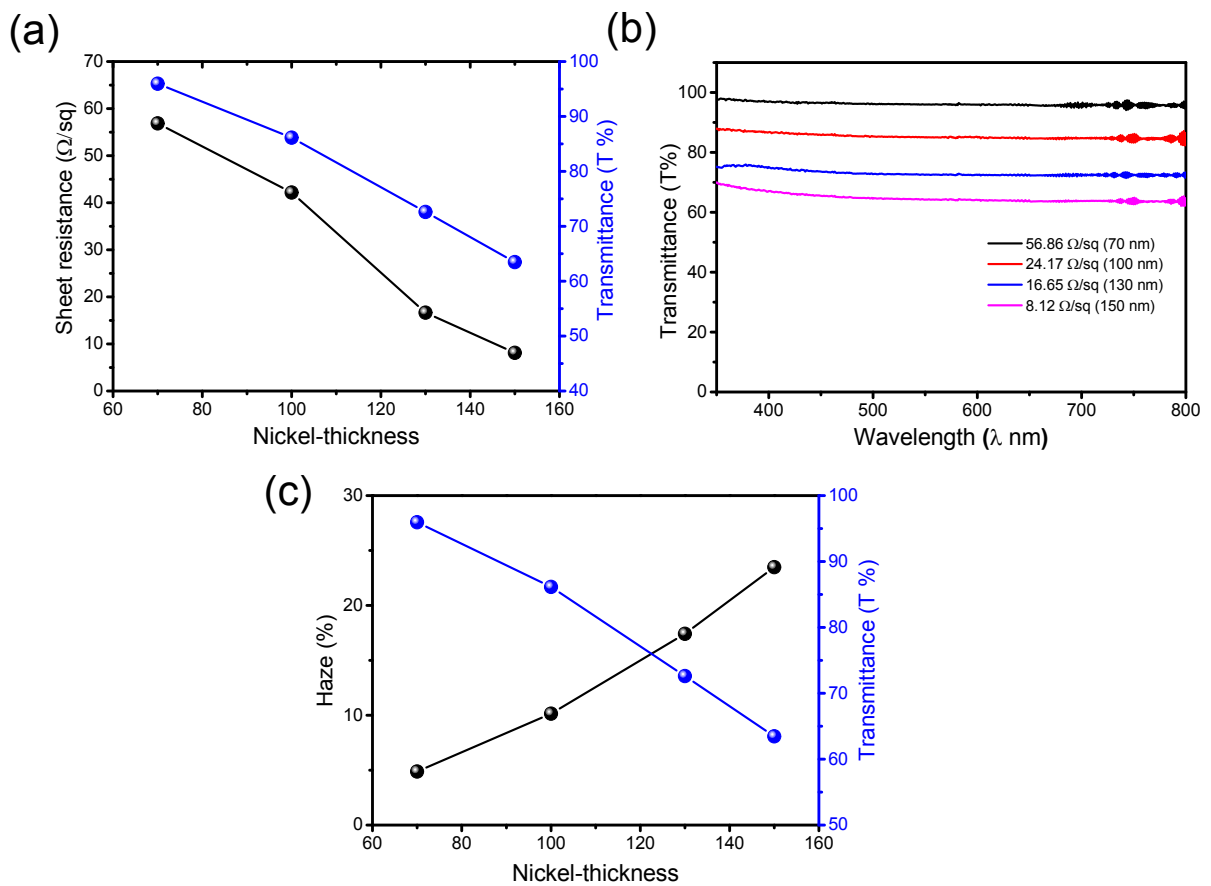

**Fig. S2** (a) Sheet resistance and transmittance (at 550 nm) of Ni-mesh network as a function of the thickness of the Ni-mesh deposited. (b) UV-visible transmittance spectra of the Ni-mesh network on PEN substrate with various sheet resistances at different Ni-mesh thickness. (c) haze value (%) and transmittance of Ni-mesh network electrode (at 550 nm) as a function of Ni-thickness.

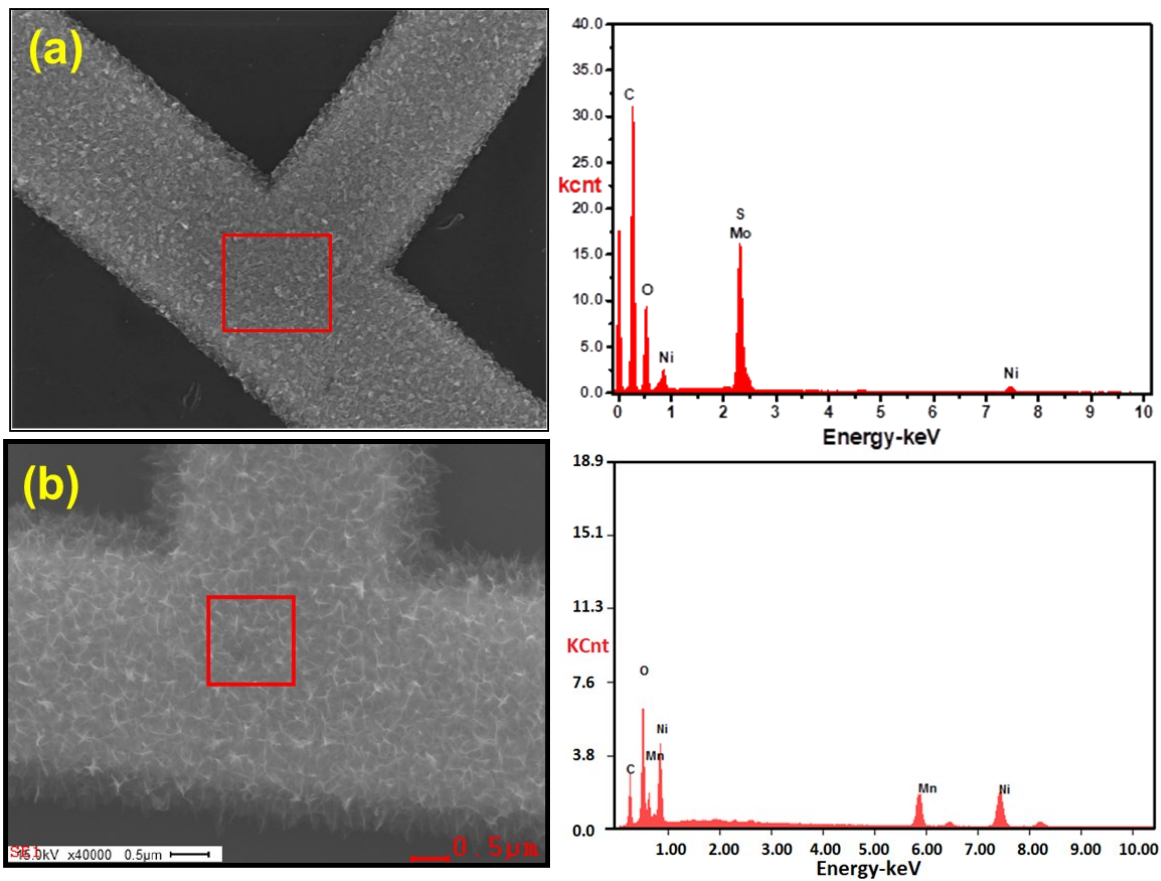

**Fig. S3** EDAX spectra: (a) MoS<sub>2</sub>@Ni-mesh network electrode. (b) MnO<sub>2</sub>@Ni-mesh network electrode.

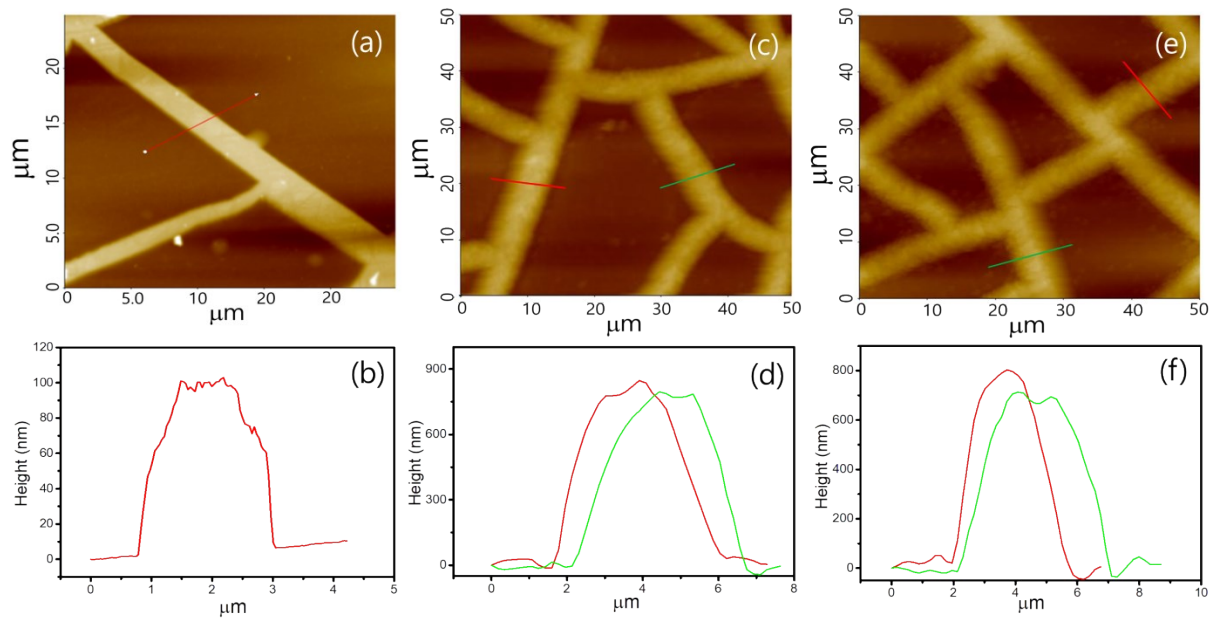

**Fig. S4** 2D-AFM and line profile analysis images: (a, b) pristine Ni-mesh, (c, d) MoS<sub>2</sub>@Ni-mesh, (e, f) MnO<sub>2</sub>@Ni-mesh on PEN substrate.



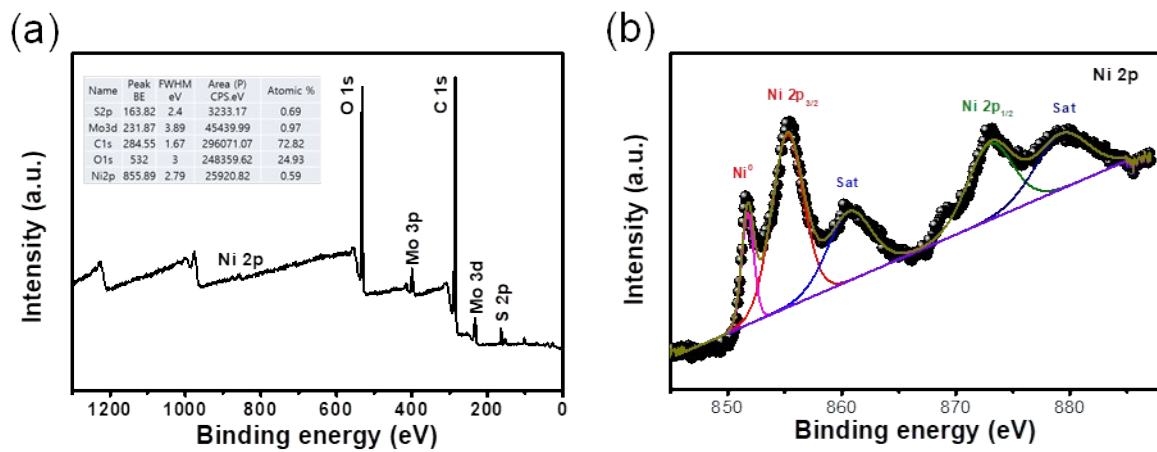

**Fig. S5** (a) The full XPS survey spectrum of the MoS<sub>2</sub> nanosheet@Ni-mesh electrode. (b) High - resolution fitted XPS spectra of Ni 2p of the MnO<sub>2</sub> nanosheet@Ni-mesh electrode.

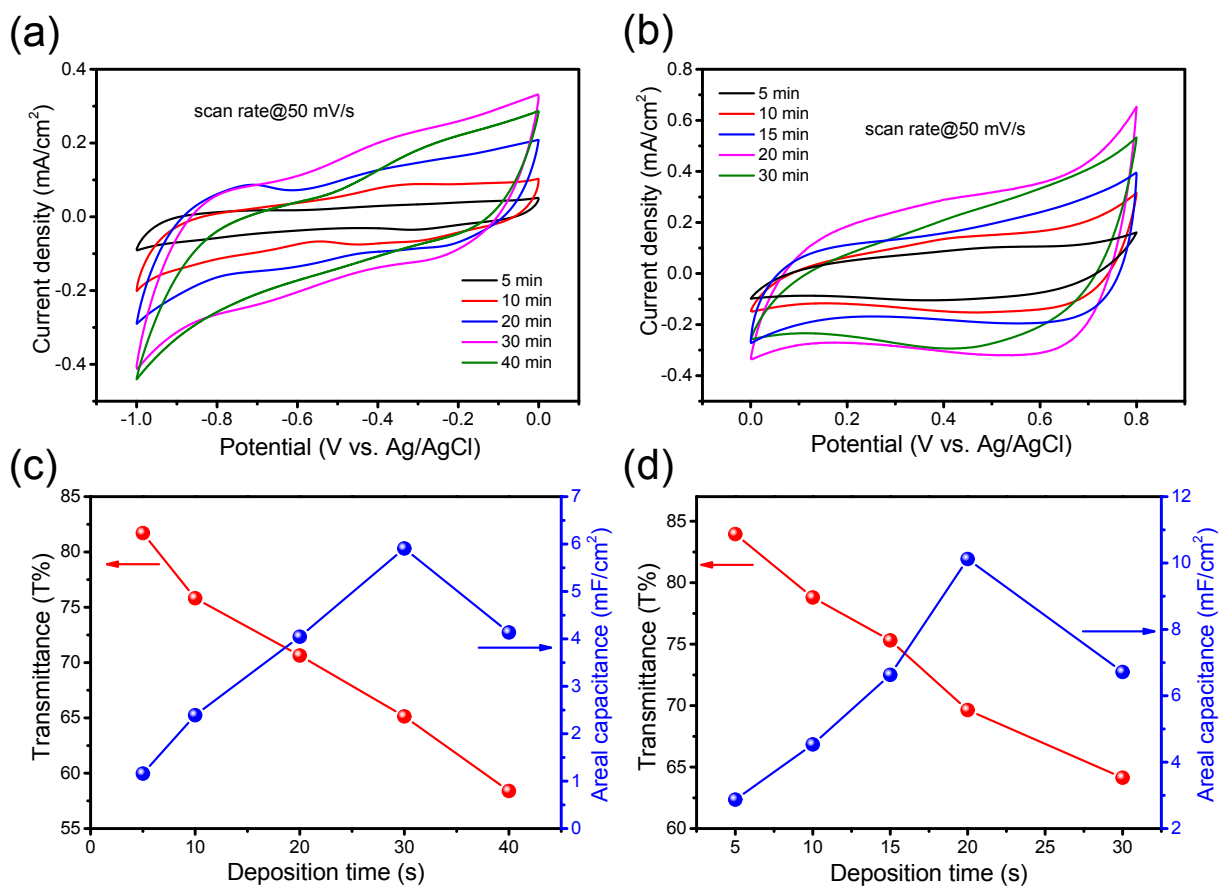

**Fig. S6** (a) Electrochemical measurements of the MoS<sub>2</sub>@Ni-mesh and MnO<sub>2</sub>@Ni-mesh network electrodes in a three-electrode configuration in 1 M Na<sub>2</sub>SO<sub>4</sub> electrolyte. Cyclic voltammograms (CVs) of the electrodes with different electrodeposition times at a scan rate of 50 mV/s for (a) MoS<sub>2</sub>@Ni-mesh and (b) MnO<sub>2</sub>@Ni-mesh network electrode. (c, d) Optical transmittance and areal capacitance as a function of electrodeposition time (areal capacitance derived from Fig S4a, b) for MoS<sub>2</sub>@Ni-mesh (c) and MnO<sub>2</sub>@Ni-mesh (d) network electrodes.

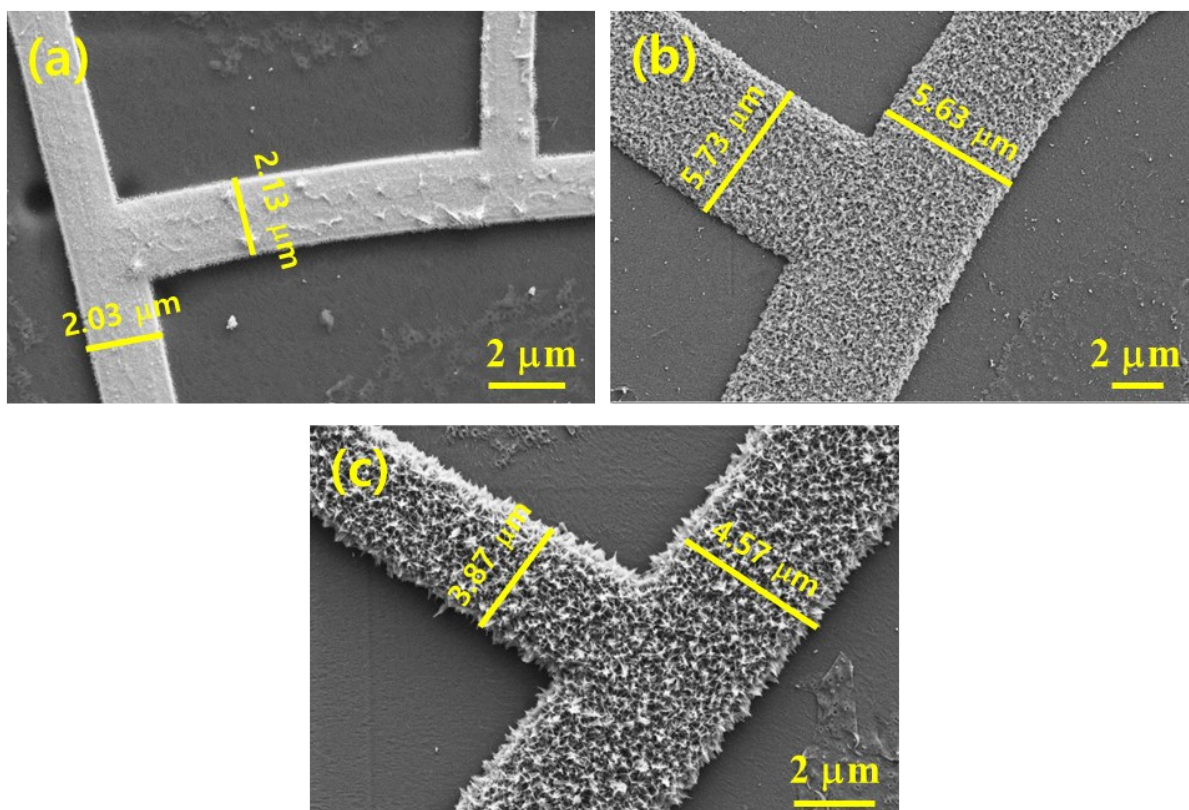

**Fig. S7** FE-SEM photographs of: (a) Ni-mesh network electrode on PEN substrate (b) MoS<sub>2</sub>@Ni-mesh network electrode on PEN substrate for 20 min electrodeposition time. (c) MnO<sub>2</sub>@Ni-mesh network electrode on PEN substrate for 15 min electrodeposition time. Indicating a large increase in the width and thickness of the mesh network after electrodeposition of the respective MoS<sub>2</sub> and MnO<sub>2</sub> materials.

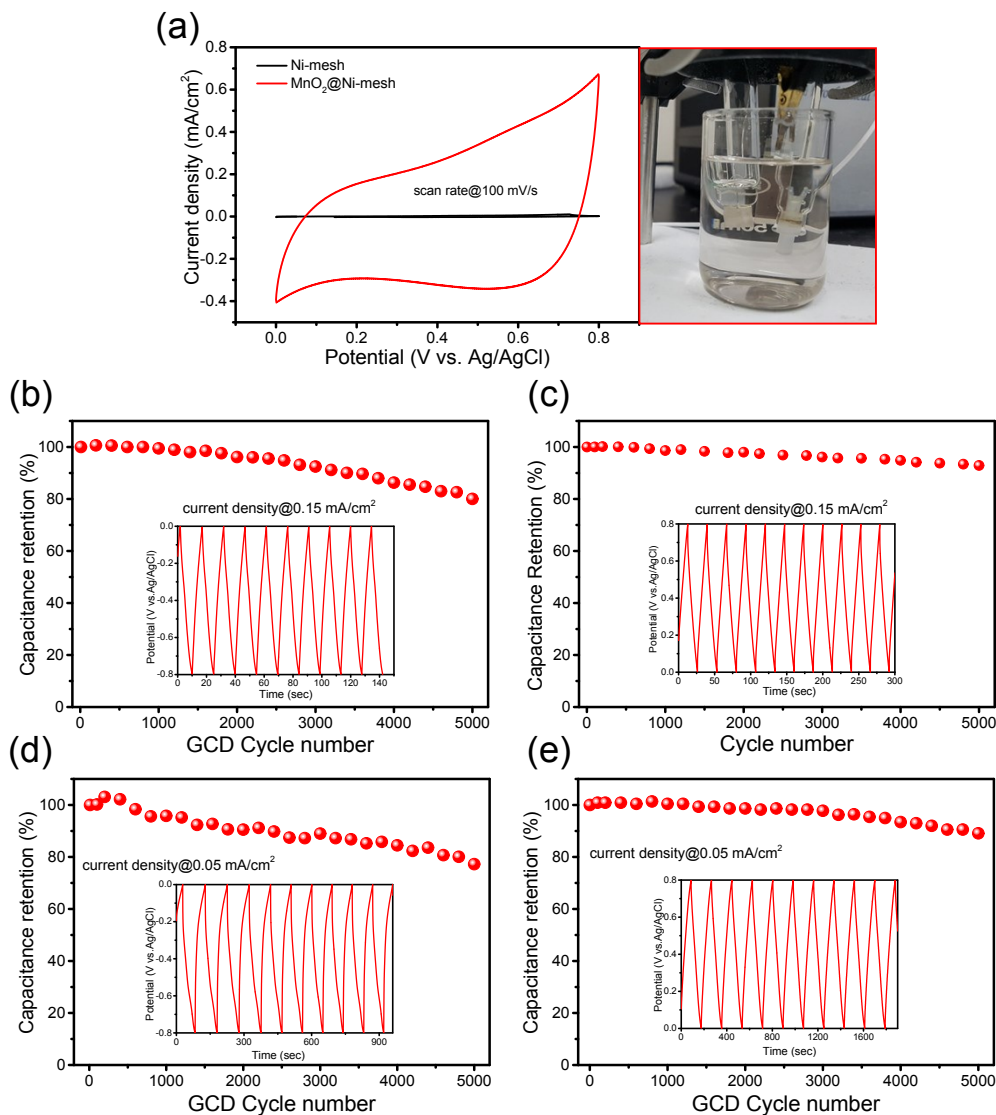

**Fig. S8** Electrochemical measurements in a three-electrode configuration in 1 M Na<sub>2</sub>SO<sub>4</sub> electrolyte: (a) CVs curve of the bare Ni-mesh in comparison with MnO<sub>2</sub>@Ni-mesh network electrodes at the scan rate of 100 mV/s, suggesting a negligible contribution from Ni-mesh. Digital photograph of the electrode sample in CV running mode showing its high transparency (Right side). Long-term cycling stability performance: (b, c) MoS<sub>2</sub>@Ni-mesh and MnO<sub>2</sub>@Ni-mesh network electrodes, respectively measured at an applied current density of 0.15 mA/cm<sup>2</sup> (inset: 1st 10 cycles). (d, e) MoS<sub>2</sub>@Ni-mesh and MnO<sub>2</sub>@Ni-mesh network electrodes, respectively measured at an applied current density of 0.05 mA/cm<sup>2</sup> (inset: 1st 10 cycles).

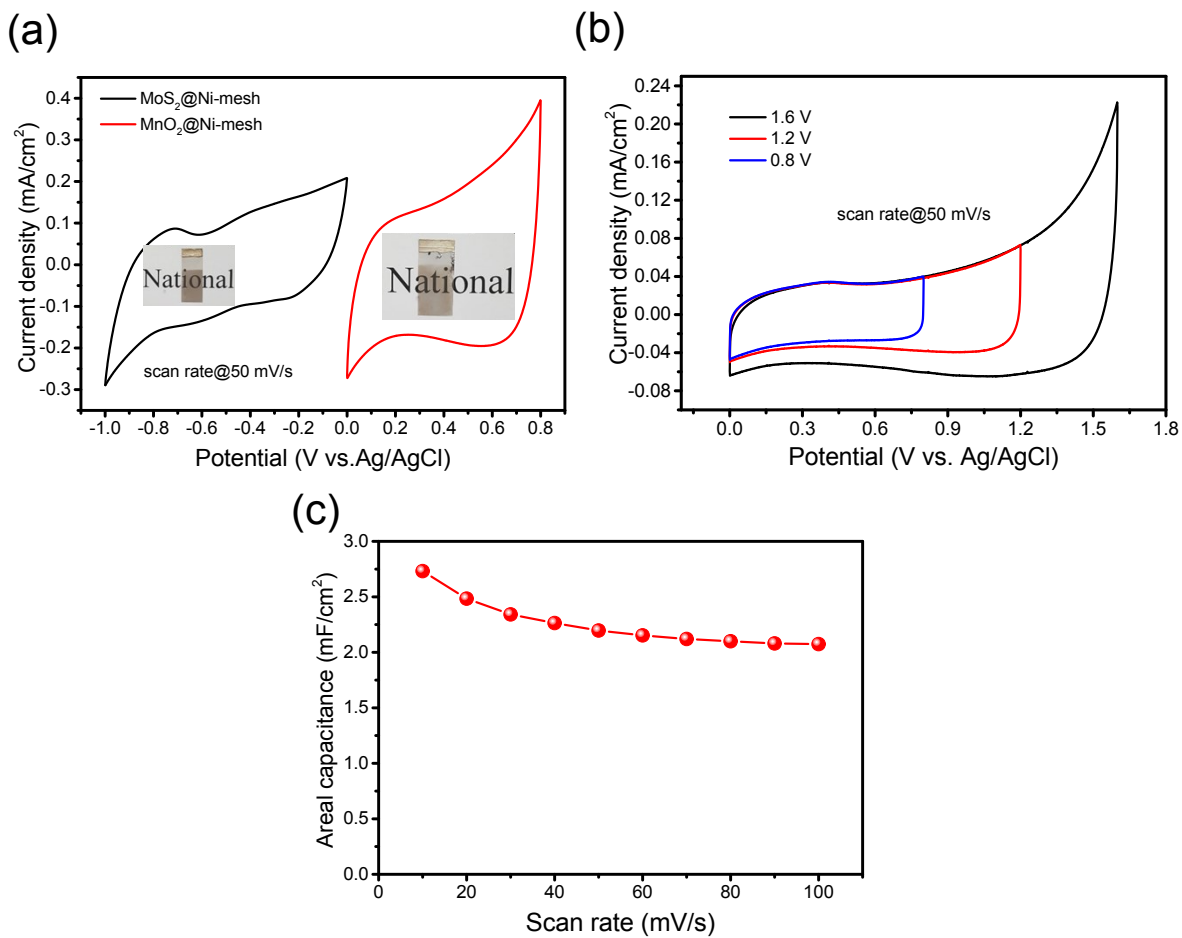

**Fig. S9** (a) Comparison of CV curves for the MoS<sub>2</sub>@Ni-mesh and MnO<sub>2</sub>@Ni-mesh network electrode at 50 mV/s. (b) Characteristic CV curve at different potential windows. (c) The areal capacitance of the FT-ASSc device as a function of scan rate measured from the CV curve (Fig. 6b).

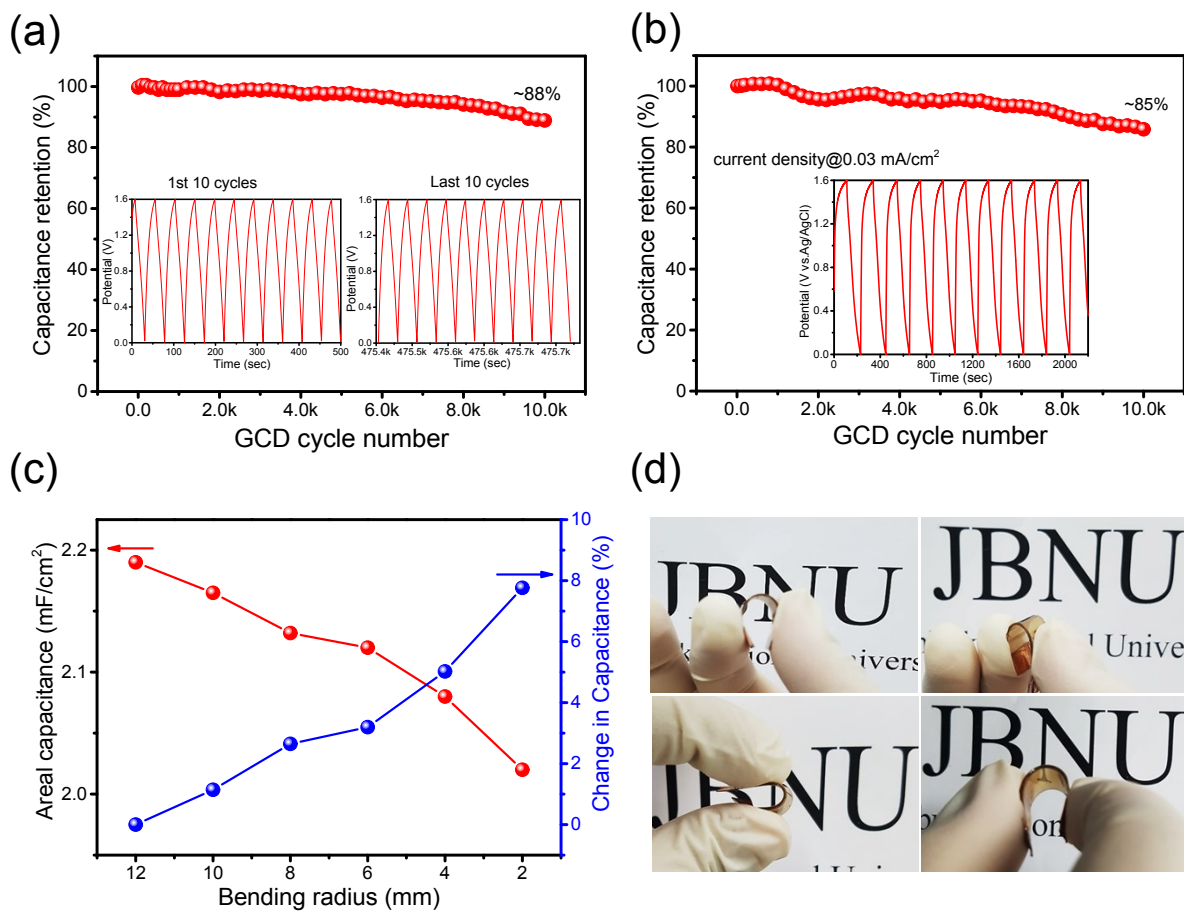

**Fig. S10** Long-term cycling stability performance of the FT-ASSc device measured at an applied current density of (a) 0.08 mA/cm<sup>2</sup> (inset: 1st 10 cycles and last 10 cycles showing the high stability of the device), and (b) 0.03 mA/cm<sup>2</sup> (inset: 1st 10 cycles). (c) Change in areal capacitances (mF/cm<sup>2</sup>) and change in capacitance (%) as a function of bending radii. (d) Digital photographs of the FT-ASSc device bending at different bending conditions.

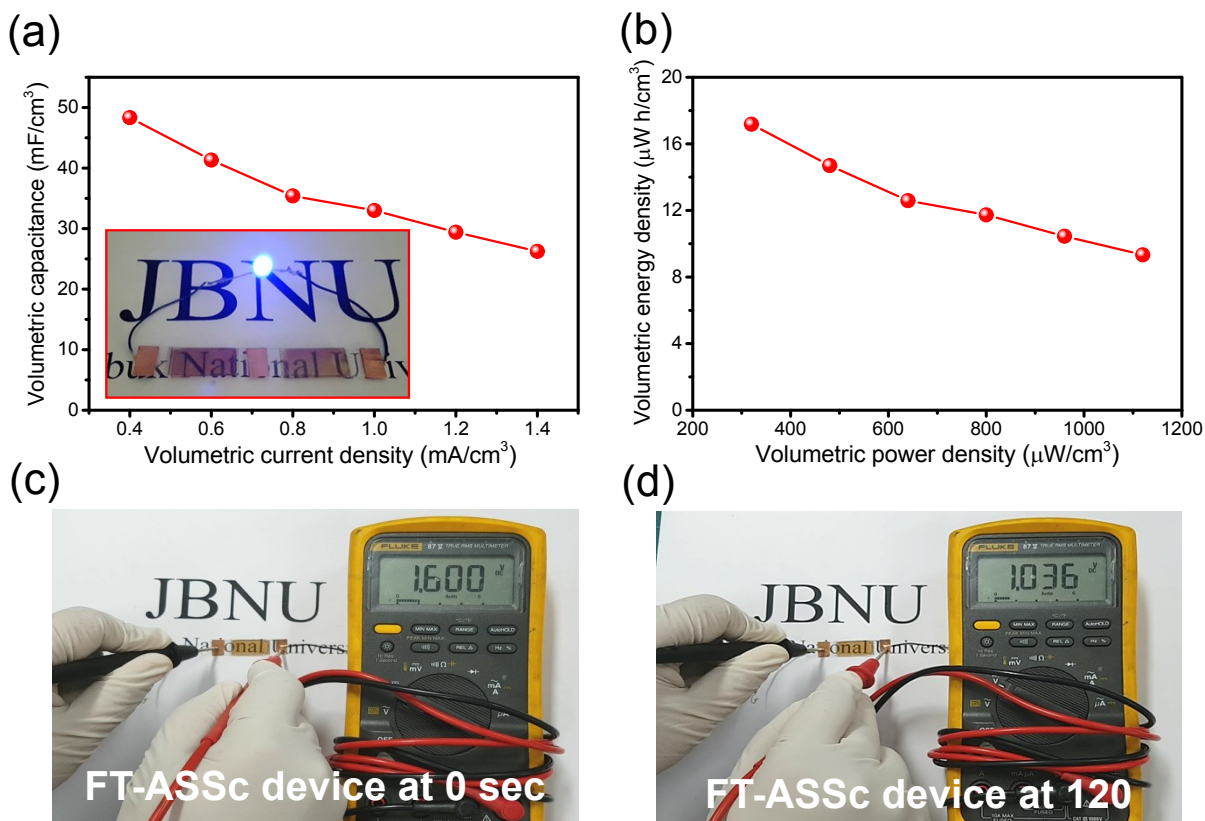

**Fig. S11** (a) The volumetric capacitance of the FT-ASSc device as a function of volumetric current density (inset: illuminating a BLUE LED by two FT-ASSc devices connected in series). (b) Volumetric energy density vs power density plot of the FT-ASSc device. (c and d) Digital photograph of a fully charged FT-ASSc device voltage (V) measured by a multimeter at different times.



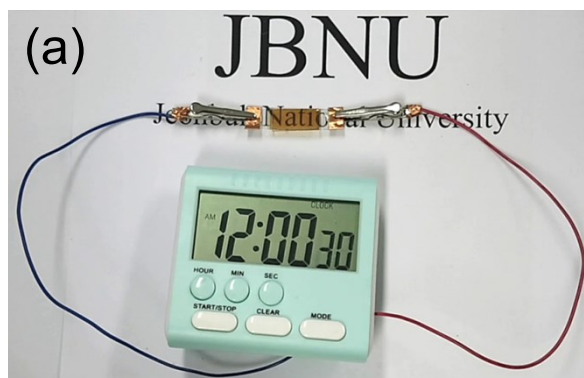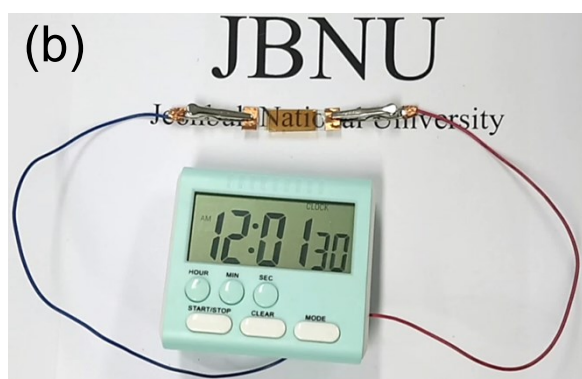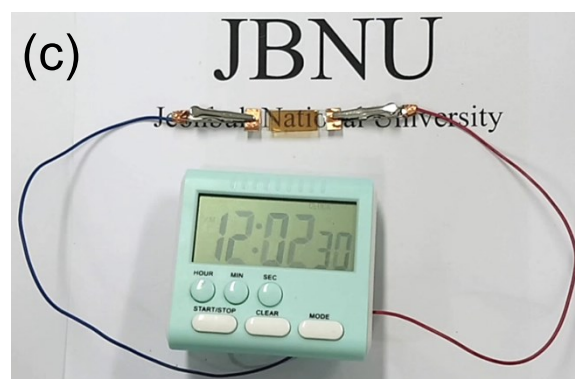

**Fig. S12** Digital photographs of a digital clock power up by a single FT-ASSc device at a different time scale: (a) 30 sec (b) 1 min 30 sec and (c) 2 min 30 sec demonstrating the high energy density and power density of the FT-ASSc device.

**Movie MVS1.** A digital clock powered by a single FT-ASSc for 3 min (mp.4)



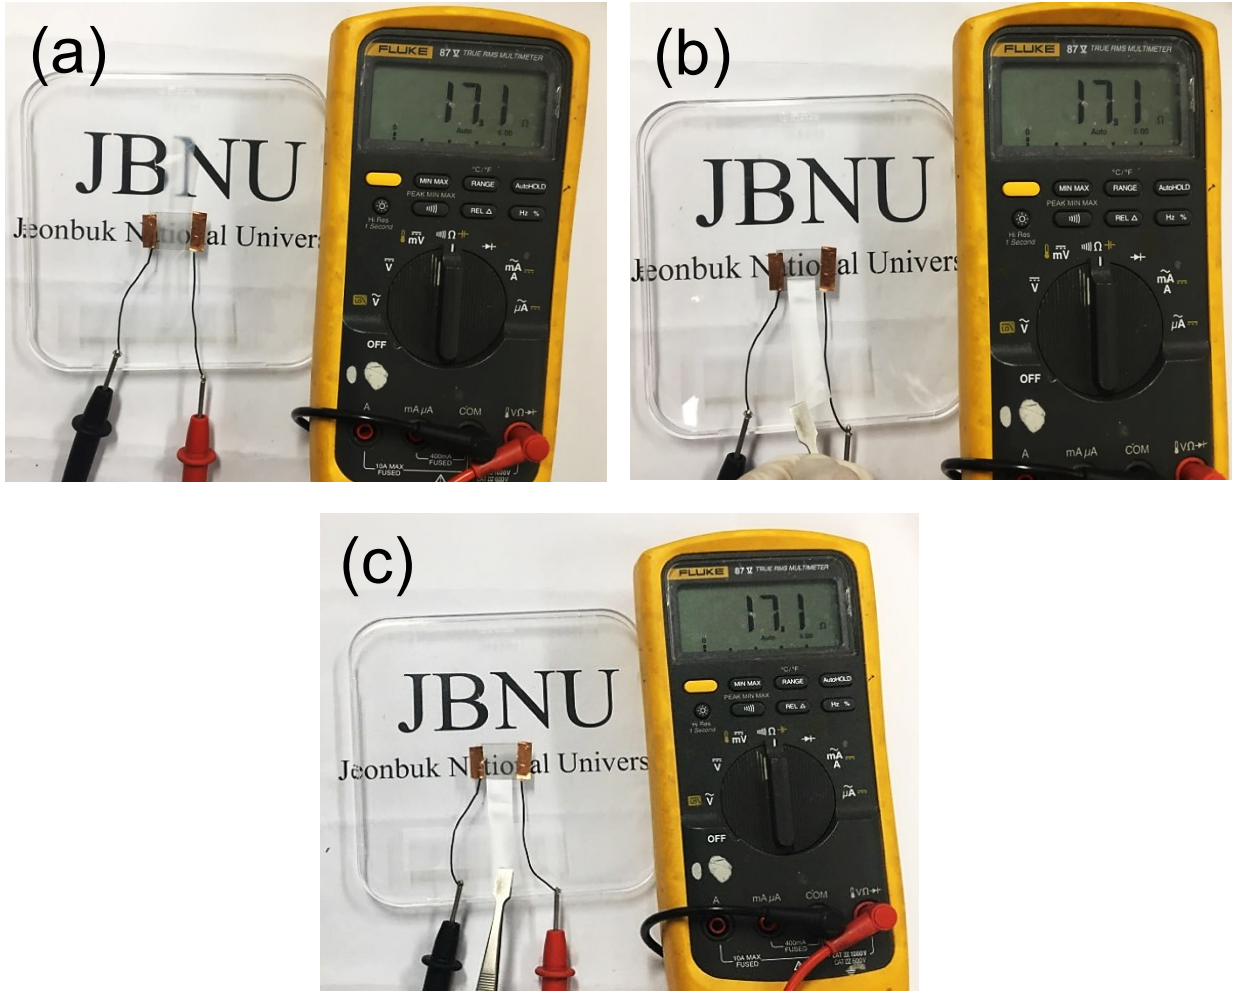

**Fig. S13** Measurement of resistance during Repeated scotch tape test for (a) 1<sup>st</sup> cycle and (b) 10<sup>th</sup> cycles, and (c) 30<sup>th</sup> cycles

**Table S1.** Comparison of the areal capacitance, transparency, specific scan rates/GCD current densities, and potential window of various transparent supercapacitor devices with the present work.

| <b>Material</b>                                                   | <b>C/A<br/>(mF/cm<sup>2</sup>)</b> | <b>Scan rate<br/>(V/s)/current<br/>density (A/cm<sup>2</sup>)</b> | <b>Transmittance<br/>(T%)</b> | <b>Potential<br/>window<br/>(V)</b> | <b>Reference</b> |
|-------------------------------------------------------------------|------------------------------------|-------------------------------------------------------------------|-------------------------------|-------------------------------------|------------------|
| Au@MnO <sub>2</sub> supercapacitor                                | 0.795                              | 5 μA/cm <sup>2</sup>                                              | 36                            | 1.0 V                               | [1]              |
| Graphene                                                          | 3.3                                | 0.02 mA/cm <sup>2</sup>                                           | 47                            | 1.0 V                               | [2]              |
| GNHC-GF (Symmetric device)                                        | 5.48                               | 0.015 mA/cm <sup>2</sup>                                          | 44                            | 1.0 V                               | [3]              |
| Ag/Au/PPy                                                         | 0.58                               | 5.8 μA/cm <sup>2</sup>                                            | 64                            | 0.8 V                               | [4]              |
| RuO <sub>2</sub> /PEDOT supercapacitor device (Symmetric device)  | 0.84                               | 10 mV/s                                                           | 80                            | 0.8 V                               | [5]              |
| RuO <sub>2</sub> /PEDOT supercapacitor device (Asymmetric device) | 1.06                               | 50 mV/s                                                           | 78                            | 1.2 V                               | [5]              |
| Ti <sub>3</sub> C <sub>2</sub> T <sub>x</sub> (Symmetric device)  | 0.87                               | 2 μA/cm <sup>2</sup>                                              | 80                            | 0.6 V                               | [6]              |
| Ti <sub>3</sub> C <sub>2</sub> T <sub>x</sub> (Asymmetric device) | 1.4                                | 4 μA/cm <sup>2</sup>                                              | 72                            | 1.0 V                               | [6]              |
| PEDOT:PSS/AgNWs                                                   | 0.6                                | 50 mV/s                                                           | ~51                           | 0.8 V                               | [7]              |
| ITO/Co <sub>3</sub> O <sub>4</sub>                                | 6.03                               | 1 mV/s                                                            | 51                            | 0.8 V                               | [8]              |
| In <sub>2</sub> O <sub>3</sub> /SWCNT In sphere                   | 0.81                               | 20 mV/s                                                           | 79                            | 0.8 V                               | [9]              |
| MnO <sub>2</sub> /ITO/PET                                         | 4.73                               | 50 μA/cm <sup>2</sup>                                             | 44                            | 0.8 V                               | [10]             |
| ITO/Ni@Gr-TF/Fe@Gr-TF                                             | 10.9                               | 20 mV/s                                                           | 51                            | 1.0 V                               | [11]             |
| AgNW/rGO/PANI(Symmetric device)                                   | 6.4                                | 0.08 mA/cm <sup>2</sup>                                           | 57                            | 1.0 V                               | [12]             |
| Co(OH) <sub>2</sub> /AgNWs (Symmetric device)                     | 0.9                                | 10 mV/s                                                           | ~73                           | 0.6 V                               | [13]             |
| <b>FT-ASSc device (Asymmetric device)</b>                         | <b>2.73</b>                        | <b>10 mV/s</b>                                                    | <b>~50</b>                    | <b>1.6 V</b>                        | <b>This work</b> |

**Table S2.** Comparison of the areal capacitance, specific scan rates/GCD current densities, transparency, potential window, the stability of various transparent supercapacitor electrodes with the present work.

| Material                                      | C/A<br>(mF/cm <sup>2</sup> ) | Scan rate<br>(V/s)/current<br>density<br>(A/cm <sup>2</sup> ) | Transmittance<br>(T%) | Potential<br>window<br>(V) | Stability<br>Cycle               | Reference        |
|-----------------------------------------------|------------------------------|---------------------------------------------------------------|-----------------------|----------------------------|----------------------------------|------------------|
| Au@MnO <sub>2</sub><br>supercapacitor         | 4.72                         | 5 μA/cm <sup>2</sup>                                          | ~48                   | 0.0-1.0                    | -                                | [1]              |
| RuO <sub>2</sub> /PEDOT                       | 2.2                          | 5 mV/s                                                        | ~89                   | 0.0-0.8                    | -                                | [5]              |
| Ti <sub>3</sub> C <sub>2</sub> T <sub>x</sub> | 3.4                          | 10 mV/s                                                       | ~40                   | -0.15-0.5                  | -                                | [6]              |
| Fe@Gr-TF                                      | 76.5                         | 0.2 mA/cm <sup>2</sup>                                        | ~70                   | -1.25-0.0                  | 1000<br>(~76% retention)         | [11]             |
| Co(OH) <sub>2</sub> /AgNWs                    | 5.18                         | 10 mV/s                                                       | ~73                   | 0.0-0.6                    | -                                | [13]             |
| PEDOT:PSS                                     | 1.18                         | 0.025 mA/cm <sup>2</sup>                                      | 65                    | 0.0-0.8                    | 1000                             | [14]             |
| Au/MnO <sub>2</sub> network                   | 3.23                         | 0.005 mA/cm <sup>2</sup>                                      | ~76                   | 0.0-0.8                    | 500                              | [15]             |
| Embedded Ag Grid<br>electrode                 | 2.79                         | 10 mV/s                                                       | ~81                   | 0.0-0.8                    | 10,000<br>(~92% retention)       | [16]             |
| Embedded Ni<br>mesh/PEDOT:PSS                 | 0.52                         | 50 mV/s                                                       | ~83                   | 0.0-0.8                    | 5000<br>(~95% retention)         | [17]             |
| MnO <sub>2</sub> @Ni                          | 80.7                         | 5 mV/s                                                        | ~80                   |                            | 10,000<br>(~96% retention)       | [18]             |
| HTSE film                                     | 3.64                         | 10 mV/s                                                       | ~85                   | 0.0-1.0                    | 10,000<br>(~95% retention)       | [19]             |
| AgNWs/NiOH/PEDOT<br>:PSS                      | 3.45                         | 10 mV/s                                                       | 86                    | 0.0-0.8                    | -                                | [20]             |
| MnO <sub>2</sub> @AuNFs                       | 8.26                         | 5 mV/s                                                        | 86                    | 0.0-0.8                    | 10,000<br>(~94% retention)       | [21]             |
| <b>MoS<sub>2</sub>@Ni-mesh<br/>(negatrod)</b> | <b>7.31</b>                  | <b>10 mV/s</b>                                                | <b>~70</b>            | <b>-1.0-0.0</b>            | <b>5000<br/>(~80% retention)</b> | <b>This work</b> |
| <b>MnO<sub>2</sub>@Ni-mesh<br/>(positrod)</b> | <b>9.73</b>                  | <b>10 mV/s</b>                                                | <b>~75</b>            | <b>0.0-0.8</b>             | <b>5000<br/>(~90% retention)</b> | <b>This work</b> |

**Table S3.** Power densities, energy densities, potential window, and stability of our FT-ASSc device in comparison with the reported transparent supercapacitor devices.

| Active material                                                                                           | Power density<br>( $\mu\text{W}/\text{cm}^2$ ) | Energy<br>density<br>( $\mu\text{Wh}/\text{cm}^2$ ) | Potential<br>Window<br>(V) | Transmittance<br>(T%) | Stability<br>Cycle                                 | Ref                  |
|-----------------------------------------------------------------------------------------------------------|------------------------------------------------|-----------------------------------------------------|----------------------------|-----------------------|----------------------------------------------------|----------------------|
| $\text{Ti}_3\text{C}_2\text{T}_x$ (Asymmetric)                                                            | 2.36                                           | 0.049                                               | 1.0 V                      | 72%                   | 20,000 (~100%<br>capacitance<br>retention)         | [6]                  |
|                                                                                                           | 4.33                                           | 0.034                                               |                            |                       |                                                    |                      |
|                                                                                                           | 8.29                                           | 0.025                                               |                            |                       |                                                    |                      |
|                                                                                                           | 16.44                                          | 0.02                                                |                            |                       |                                                    |                      |
|                                                                                                           | 25.37                                          | 0.018                                               |                            |                       |                                                    |                      |
| $\text{RuO}_2/\text{PEDOT:PSS}$                                                                           | 0.28                                           | 0.015                                               | 0.8 V                      | ~80%                  | 10,000 (~84%<br>capacitance<br>retention)          | [5]                  |
|                                                                                                           | 1.13                                           | 0.014                                               |                            |                       |                                                    |                      |
|                                                                                                           | 2.08                                           | 0.014                                               |                            |                       |                                                    |                      |
|                                                                                                           | 4.83                                           | 0.014                                               |                            |                       |                                                    |                      |
|                                                                                                           | 19.47                                          | 0.011                                               |                            |                       |                                                    |                      |
| Ag NW/ $\text{Ni}(\text{OH})_2$ -<br>PEIE/PEDOT:PSS                                                       | 3.2                                            | 0.074                                               | 0.8 V                      | ~80%                  | 10,000 (~92%<br>capacitance<br>retention)          | [20]                 |
|                                                                                                           | 4                                              | 0.072                                               |                            |                       |                                                    |                      |
|                                                                                                           | 6                                              | 0.069                                               |                            |                       |                                                    |                      |
|                                                                                                           | 12                                             | 0.059                                               |                            |                       |                                                    |                      |
|                                                                                                           | 20                                             | 0.05                                                |                            |                       |                                                    |                      |
| $\text{MnO}_2@$ AuNFs                                                                                     | 4                                              | 0.143                                               | 0.8 V                      | ~79%                  | 10,000 (~95%<br>capacitance<br>retention)          | [21]                 |
|                                                                                                           | 8                                              | 0.101                                               |                            |                       |                                                    |                      |
|                                                                                                           | 12                                             | 0.078                                               |                            |                       |                                                    |                      |
|                                                                                                           | 16                                             | 0.066                                               |                            |                       |                                                    |                      |
|                                                                                                           | 20                                             | 0.054                                               |                            |                       |                                                    |                      |
| $\text{Co}(\text{OH})_2/\text{AgNWs}$                                                                     | 28.8                                           | 0.04                                                | 0.6 V                      | ~54%                  | 10,000 (~91%<br>capacitance<br>retention)          | [13]                 |
|                                                                                                           | 43.5                                           | 0.0375                                              |                            |                       |                                                    |                      |
|                                                                                                           | 57.3                                           | 0.035                                               |                            |                       |                                                    |                      |
|                                                                                                           | 70.6                                           | 0.0335                                              |                            |                       |                                                    |                      |
|                                                                                                           | 83.1                                           | 0.03                                                |                            |                       |                                                    |                      |
| $\text{NiCoS}@$ Ni@Cu NFs                                                                                 | 11.16                                          | 0.49                                                | 0.8 V                      | ~65%                  | 10,000 (~90%<br>capacitance<br>retention)          | [22]                 |
|                                                                                                           | 15.27                                          | 0.34                                                |                            |                       |                                                    |                      |
|                                                                                                           | 19.18                                          | 0.27                                                |                            |                       |                                                    |                      |
|                                                                                                           | 22.82                                          | 0.21                                                |                            |                       |                                                    |                      |
|                                                                                                           | 26.18                                          | 0.17                                                |                            |                       |                                                    |                      |
| <b><math>\text{MoS}_2@</math>Ni-<br/>mesh/<math>\text{MnO}_2@</math>Ni-<br/>mesh (FT-ASSc<br/>device)</b> | <b>16</b>                                      | <b>0.86</b>                                         | <b>1.6 V</b>               | <b>~50%</b>           | <b>10,000 (~88%<br/>capacitance<br/>retention)</b> | <b>This<br/>work</b> |
|                                                                                                           | <b>24</b>                                      | <b>0.73</b>                                         |                            |                       |                                                    |                      |
|                                                                                                           | <b>32</b>                                      | <b>0.63</b>                                         |                            |                       |                                                    |                      |
|                                                                                                           | <b>40</b>                                      | <b>0.59</b>                                         |                            |                       |                                                    |                      |
|                                                                                                           | <b>42</b>                                      | <b>0.52</b>                                         |                            |                       |                                                    |                      |

## Reference

- [1] T. Qiu, B. Luo, M. Giersig, E.M. Akinoglu, L. Hao, X. Wang, L. Shi, M. Jin, L. Zhi, *Small*, 2014, **10**, 4136–4141.
- [2] N. Li, G. Yang, Y. Sun, H. Song, H. Cui, G. Yang, C. Wang, *Nano Lett.*, 2015, **15**, 3195–3203.
- [3] N. Li, X. Huang, H. Zhang, Z. Shi, C. Wang, *J. Mater. Chem. A*, 2017, **5**, 16803.
- [4] H. Moon, H. Lee, J. Kwon, Y.D. Suh, D.K. Kim, I. Ha, J. Yeo, S. Hong, S.H. Ko, *Sci. Rep.*, 2017, **7**, 41981.
- [5] C. (John) Zhang, T.M. Higgins, S.H. Park, S.E. O'Brien, D. Long, J.N. Coleman, V. Nicolosi, *Nano Energy*, 2016, **28**, 495–505.
- [6] C.J. Zhang, B. Anasori, A. Seral-Ascaso, S.H. Park, N. McEvoy, A. Shmeliov, G.S. Duesberg, J.N. Coleman, Y. Gogotsi, V. Nicolosi, *Adv. Mater.*, 2017, **29**, 1–9. doi:10.1002/adma.201702678.
- [7] X. Liu, D. Li, X. Chen, W.Y. Lai, W. Huang, *ACS Appl. Mater. Interfaces*, 2018, **10**, 32536–32542.
- [8] X.Y. Liu, Y.Q. Gao, G.W. Yang, *Nanoscale*, 2016, **8**, 4227–4235.
- [9] P. Chen, G. Shen, *Appl. Phys. Lett.*, 2009, **94**, 043113 1.
- [10] Y. Wang, W. Zhou, Q. Kang, J. Chen, Y. Li, X. Feng, D. Wang, Y. Ma, W. Huang, *ACS Appl. Mater. Interfaces*, 2018, **10**, 27001–27008.
- [11] N. Li, X. Huang, H. Zhang, *J. Alloy. Compounds*, 2017, **712**, 194.
- [12] F. Chen, P. Wan, H. Xu, X. Sun, *ACS Appl. Mater. Interfaces*, 2017, **9**, 17865–17871.
- [13] H. Sheng, X. Zhang, Y. Ma, P. Wang, J. Zhou, Q. Su, W. Lan, E. Xie, and C. John Zhang, , *ACS Appl. Mater. Interfaces*, 2019, **11**, 8992–9001.
- [14] T. Cheng, Y. Z. Zhang, J. D. Zhang, W.Y. Lai, W. Huang, *J. Mater. Chem. A*, 2016, **4**, 10493–10499.
- [15] S. Kiruthika, C. Sow, G.U. Kulkarni, *Small*, 2017, **13**, 1–9.
- [16] J.L. Xu, Y.H. Liu, X. Gao, Y. Sun, S. Shen, X. Cai, L. Chen, S.D. Wang, *ACS Appl. Mater. Interfaces*, 2017, **9**, 27649–27656.
- [17] Y.H. Liu, J.L. Xu, S. Shen, X.L. Cai, L. Sen Chen, S.D. Wang, *J. Mater. Chem. A*, 2017, **5**, 9032–9041.
- [18] Y.H. Liu, J.L. Xu, X. Gao, Y.L. Sun, J.J. Lv, S. Shen, L. Sen Chen, S.D. Wang, *Energy Environ. Sci.*, 2017, **10**, 2534.
- [19] S. B. Singh, T. Kshetri, Th. I. Singh, N. H. Kim, J. H. Lee, *Chemical Engineering Journal*, 2019, 359, 197.
- [20] R.T. Ginting, M.M. Ovhal, J.W. Kang, *Nano Energy*, 2018, **53**, 650–657.

- [21] S. B. Singh, T. I. Singh, N. H. Kim, J. H. Lee, *J. Mater. Chem. A*, 2019, **7**, 10672–10683.
- [22] S. B. Singh, T. I. Singh, J. Dai, T. Kshetri, N.H. Kim, J. H. Lee, *Chemical Engineering Journal*, 2020, **395**, 125019 [oi.org/10.1016/j.cej.2020.125019](https://doi.org/10.1016/j.cej.2020.125019)
